# Supplementary material for: Consumption of antibiotics in Chinese public general tertiary hospitals (2011-2014): Trends, pattern changes and regional differences
Source: PLoS One. 2018 May 3;13(5):e0196668. doi: 10.1371/journal.pone.0196668 (PMC5933762; doi:10.1371/journal.pone.0196668)
Supplement: S3 Table — (XLSX) [file pone.0196668.s003.xlsx]

## Sheet: Sheet1
Use of the main classes of antibiotics in different regions in 2014 (DDD/100ID)
ATC-3	name	ATC-4	name	ATC-5	name	SWC	SC	NEC	EC	NC	CC	NWC
J01C	penicillins	J01CA	Broad-spectrum			0.909714	0.547622	1.40735	1.08769	0.91836	1.56371	1.70541
		J01CE	Narrow-spectrum			0.379836	0.442561	0.262559	0.496754	0.272392	0.351437	0.365349
		J01CF	Beta-lactamase-resistant			0.547241	0.951245	1.1825	1.65479	1.64441	1.66287	1.60408
		J01CR	Combinations with beta-lactamase inhibitors			5.63481	4.67869	4.33515	4.1596	3.52588	4.34935	3.66609
J01D	cephalosporins	J01DB	First generation			3.59361	3.91666	4.29285	2.41287	1.97134	3.58831	5.47961
		J01DC	Second generation			5.06669	8.24243	3.4797	7.60176	8.39753	5.60052	6.50178
		J01DD	Third generation			12.1173	13.3471	13.0648	11.3772	10.7614	13.1709	14.286
		J01DE	Fouth generation			0.283943	0.507676	1.57017	1.0135	0.82236	0.735698	0.241549
		J01DI	Other cephalosporins			0.23126	1.187	2.95083	1.42779	1.53664	1.33831	3.40805
		J01DI	Other cephalosporins	J01DI03	faropenem	0.204725	0.524445	0.233023	0.110623	0.300872	0	0
		J01DH	Carbapenem	J01DH02	Meropenem	1.12038	1.10586	0.996432	1.44017	1.91396	1.06142	0.943712
				J01DH03	Ertpenem	0	0	0.305503	0.00357588	1.15914	0	0.447222
				J01DH05	Biapenem	0.267229	0.332873	0.957508	0.694272	0.864625	0.707779	0.338274
				J01DH51	Imipenem and Cilastatin	0.929986	0.987032	0.541518	1.20194	0.687068	0.615488	0.681641
				J01DH55	Panipenem and Betamipron	0.941343	0.441678	0.753888	0.355501	0	0	0
J01M	quinolones	J01MA	Fluoroquinolones	J01MA01	Ofloxacin	0	0.276174	0	0.755696	0.0407916	0.167681	1.28531
				J01MA02	Ciprofloxacin	0.265157	0.541625	0.127027	0.376065	0.192635	0.187829	0.0913628
				J01MA04	Enoxacin	0	0.485796	1.14708	0	0.0378932	1.00382	0.731906
				J01MA06	Norfloxacin	0.0824474	0.0929043	0.317635	0.0986679	0.203971	0.135671	0.159165
				J01MA07	Lomefloxacin	0	0.0176262	0	0	0	0	0
				J01MA09	Sparfloxacin	0	0.624012	0	0	0	0.0552241	0
				J01MA12	Levofloxacin	3.35912	4.75747	3.26373	4.41201	3.59849	6.6321	2.81083
				J01MA14	Moxifloxacin	2.17194	1.64165	2.13779	2.04694	1.82646	0.782049	2.52656
				J01MA16	Gatifloxacin	0	0.00169216	0	0	0	0.0702527	0
				J01MA18	Pazufloxacin	0.258239	0	0.22274	0.00013271	0	0	0
		J01MB	Other quinolones	J01MB04	Pipemidic acid	0	0	0	1.90168	0	0	0
J01X	Other antibacterial	J01XA	Glycopeptide	J01XA01	Vancomycin	0.7778	0.572641	0.421043	0.81878	0.792463	0.282664	0.390161
				J01XA02	Teicoplanin	0.203628	0.340258	0.160491	0.662212	0.35529	0.898256	0.412978
